# Supplementary material for: Evaluation of a handheld near-infrared spectrophotometer for quantitative determination of two APIs in a solid pharmaceutical preparation
Source: Royal Society of Chemistry journal article supplement (doi:10.1039/c8ay01970c), 2018-12-19
Supplement: c8ay01970c1.pdf [file c8ay01970c1.pdf]

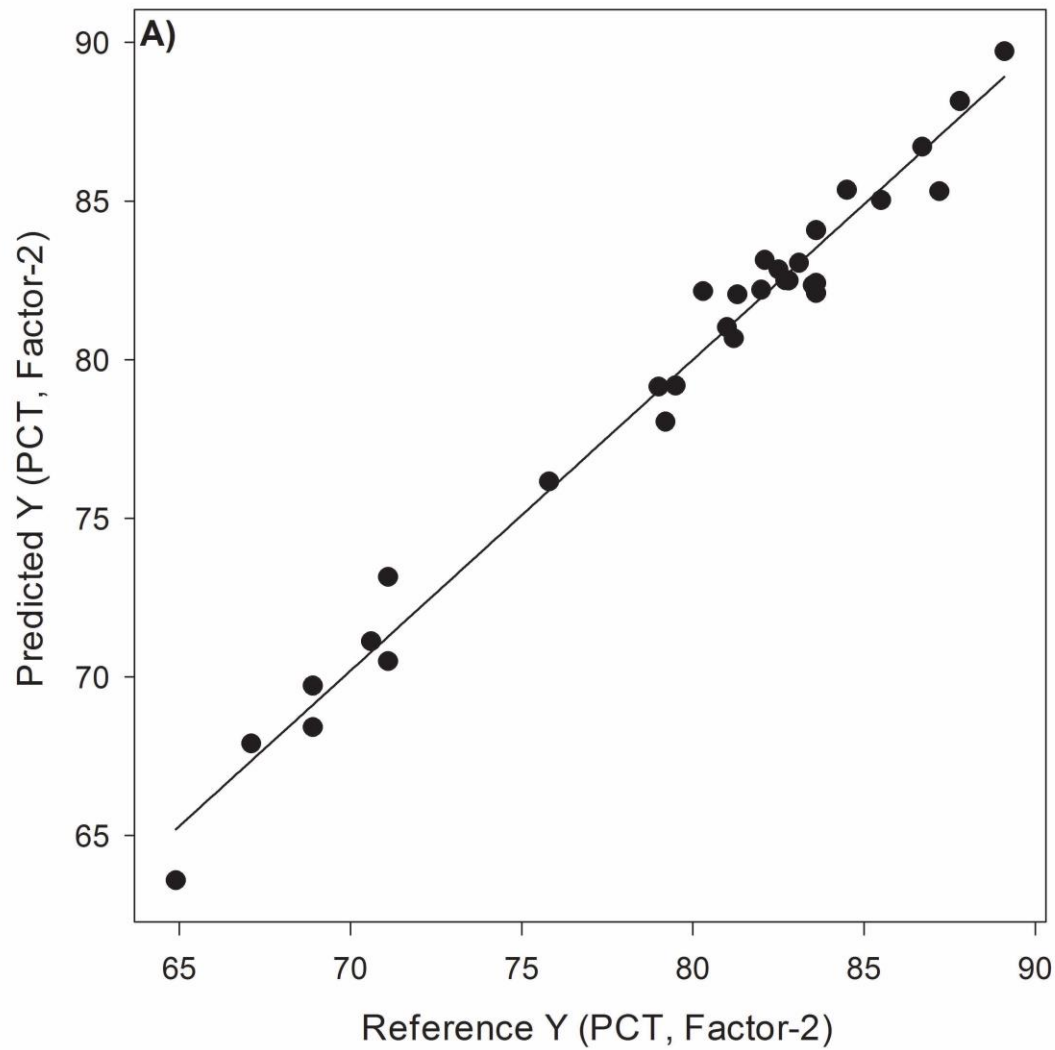

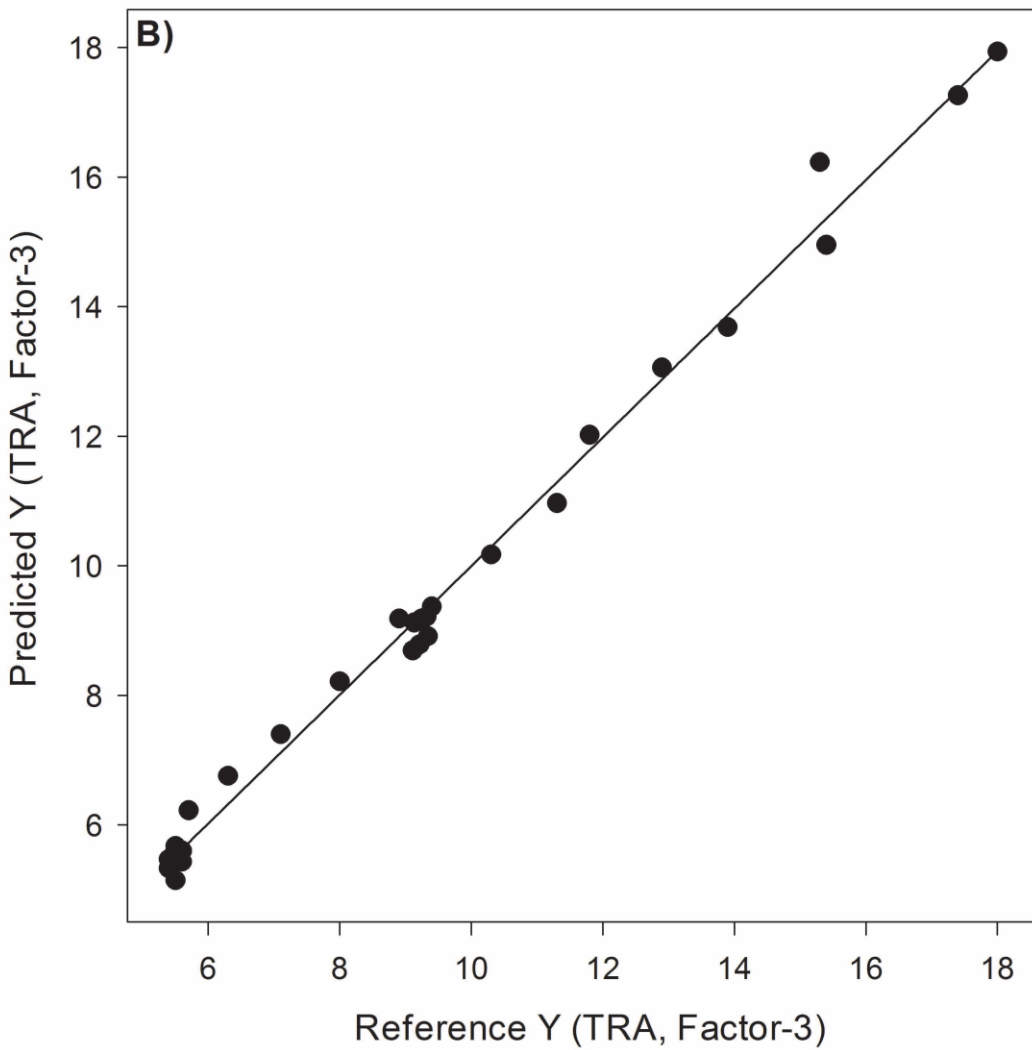

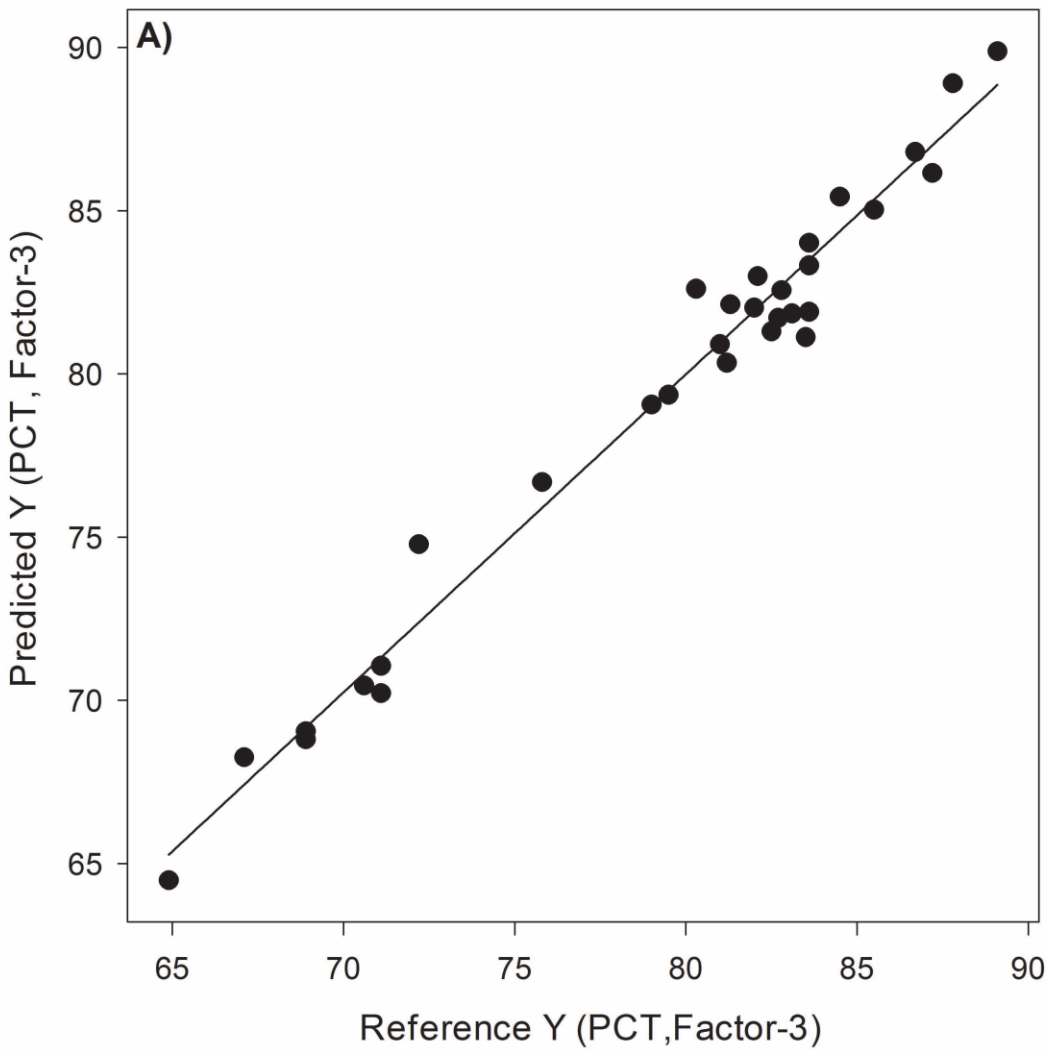

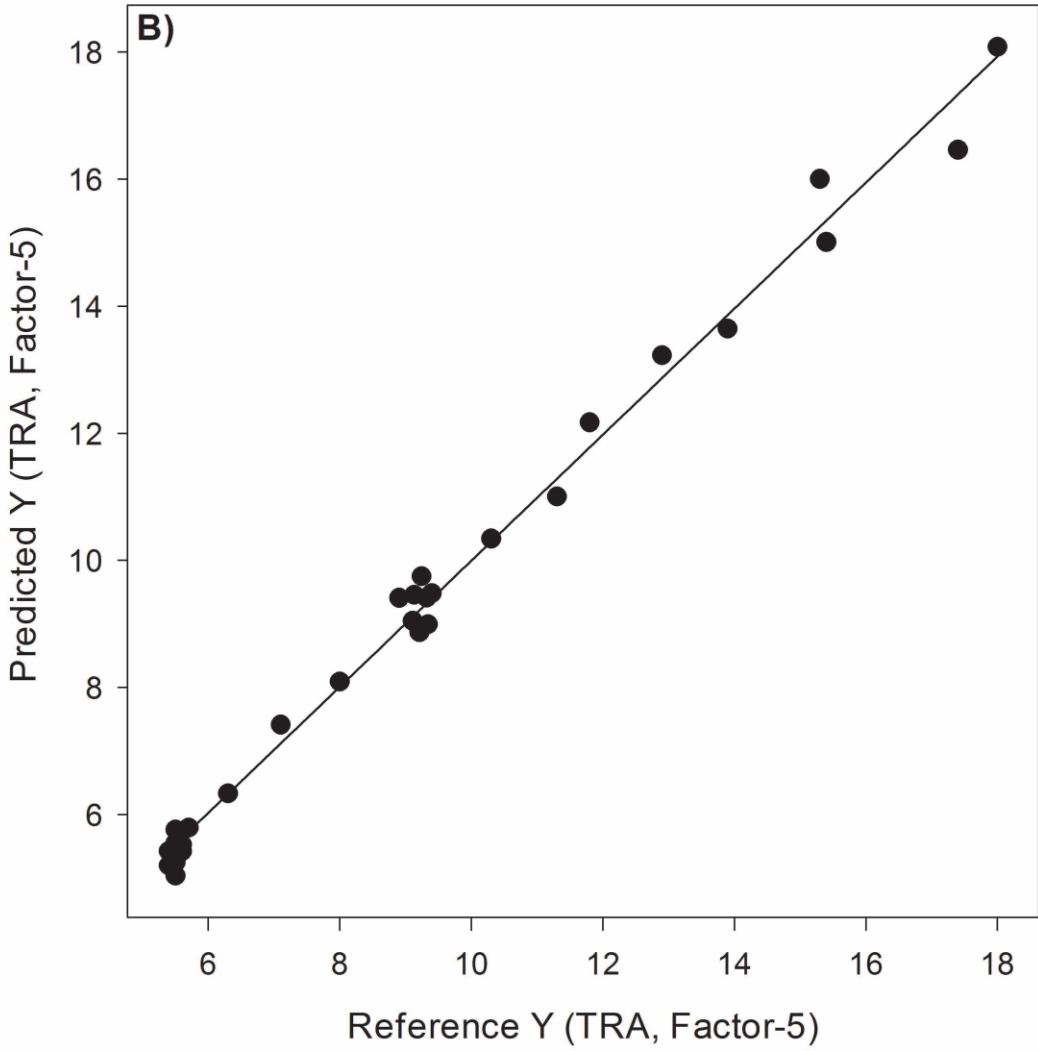

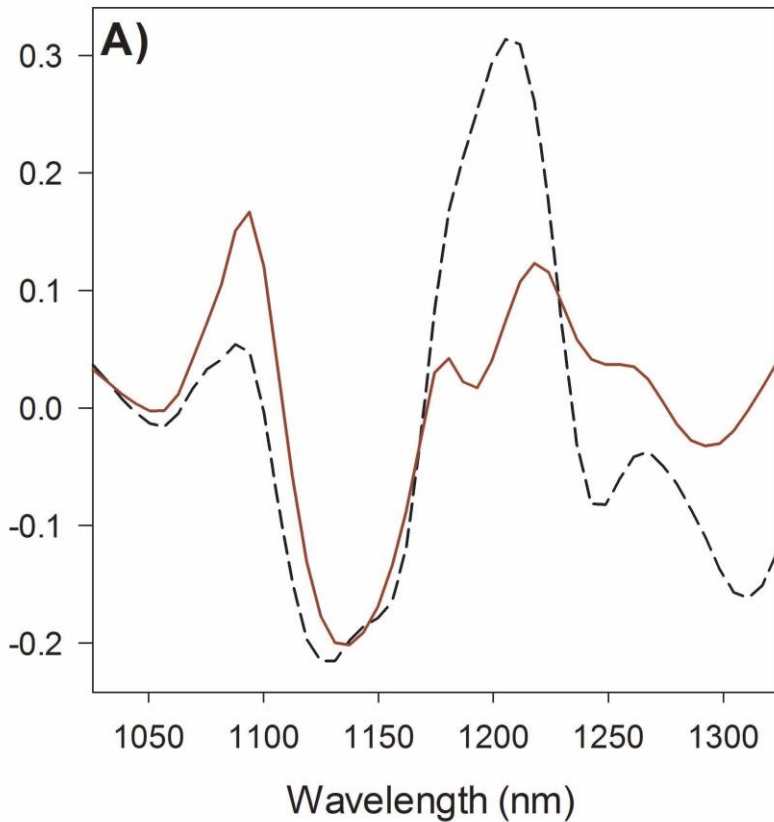

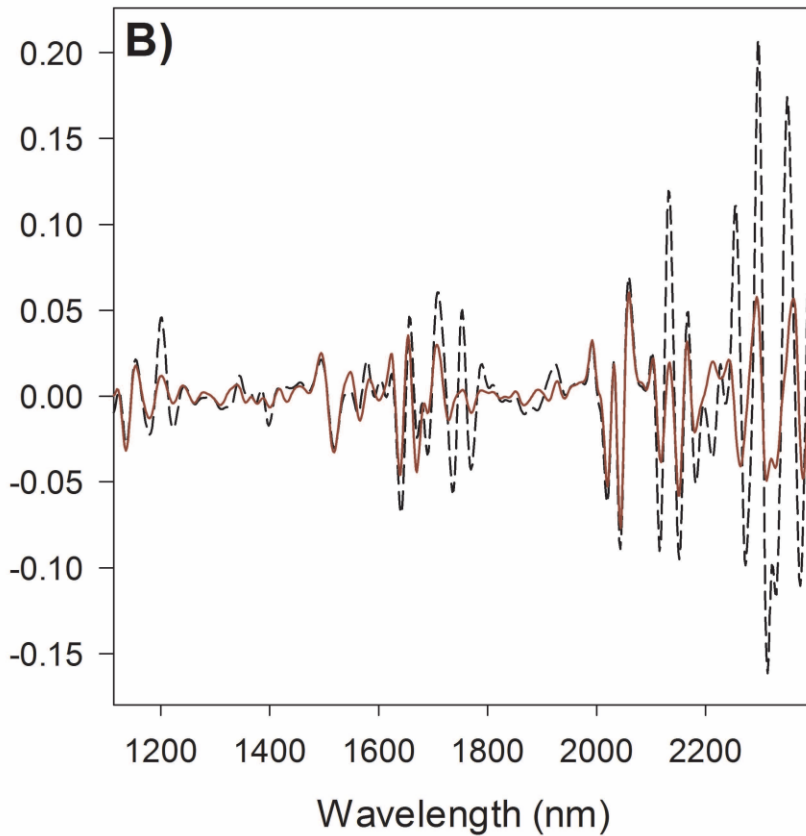

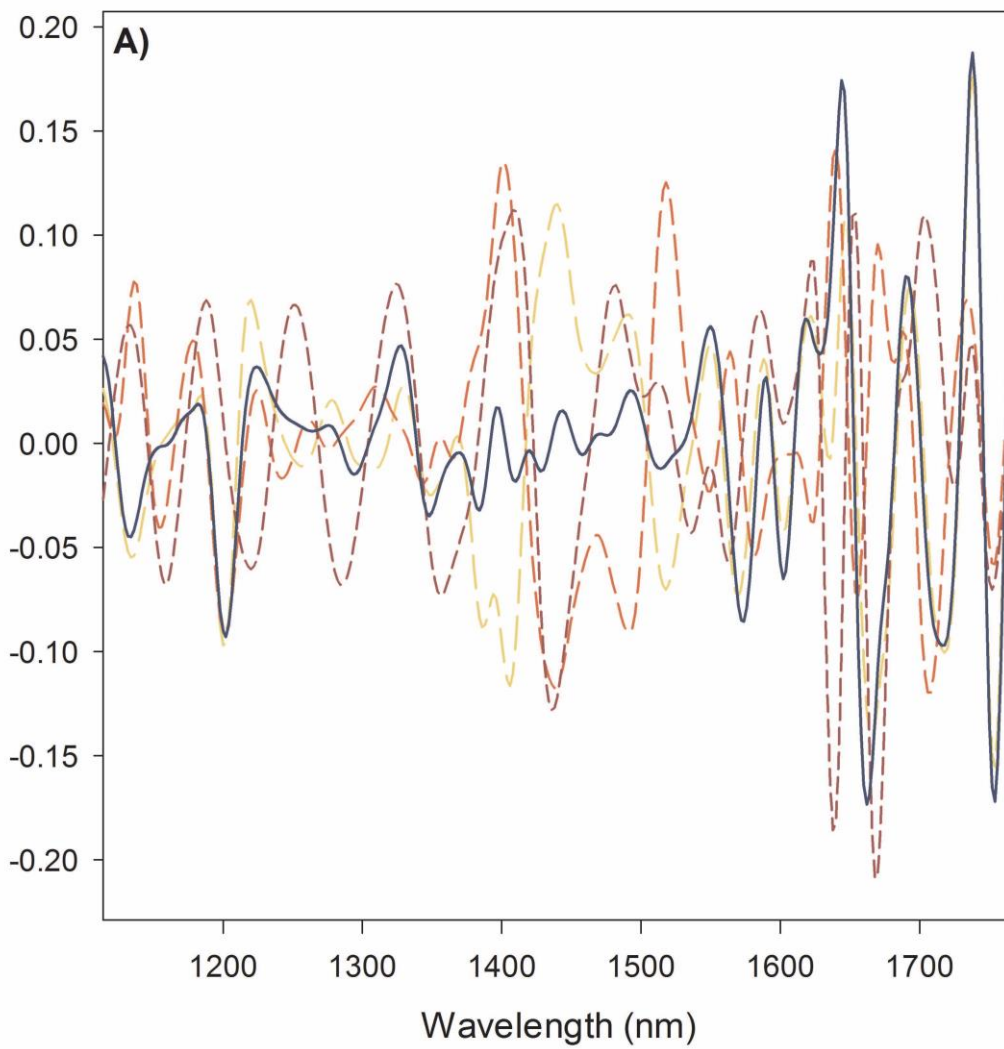

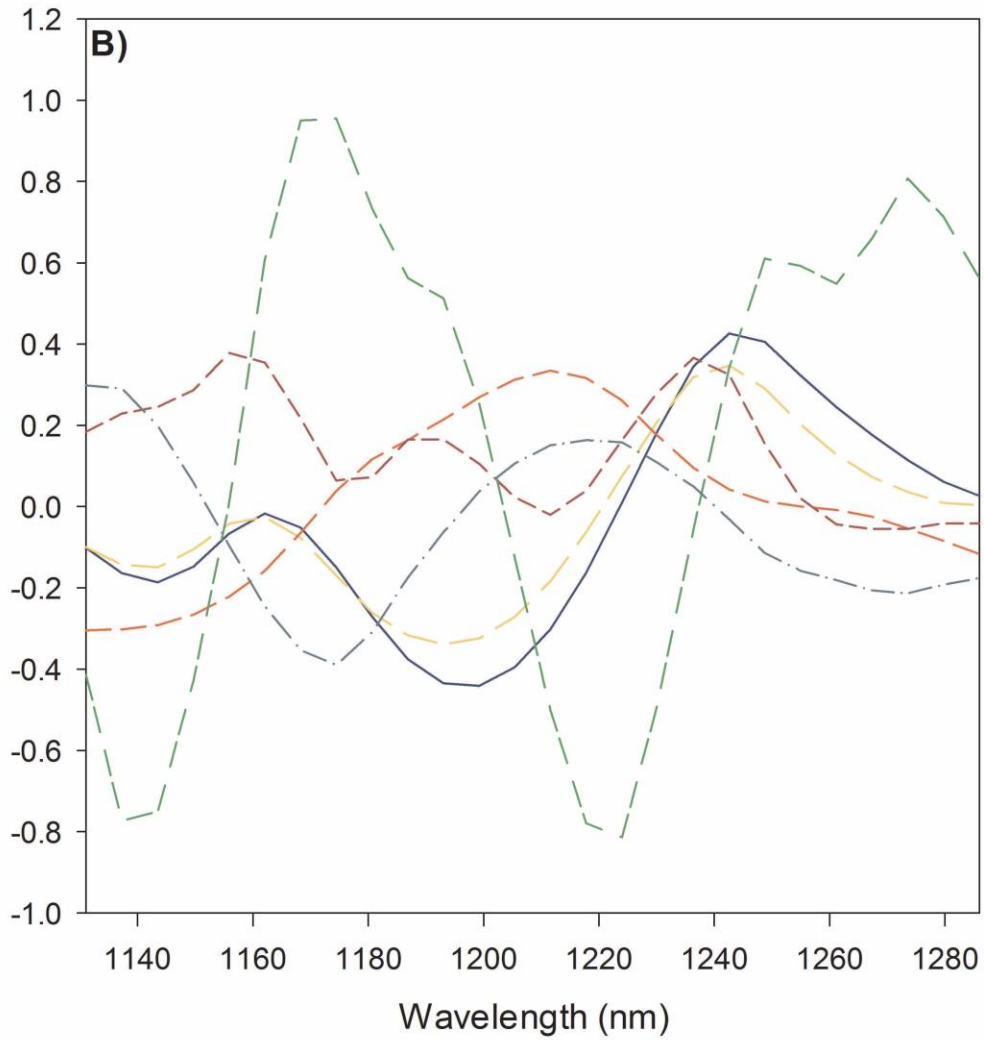



## Supplementary Figures Caption

**Figure A1.** Prediction-reference plots using benchtop spectrophotometer. (A): PCT; (B): TRA.

**Figure A2.** Prediction-reference plots using handheld spectrophotometer. (A): PCT; (B): TRA.

**Figure A3.** Comparison of the first loading (dashes) and pure spectrum (red solid line) for PCT. (A) Handheld instrument; (B) Benchtop instrument. To facilitate the visual comparison, PCT spectrum has been multiply by a factor.

**Figure A4.** Comparison of pure spectrum (solid line) and significant loadings for TRA using (A) benchtop and (B) handheld instruments. Solid dark blue line: 2D TRA; Yellow long dash: Factor 1; Orange medium dash: Factor 2; Maroon short dash: Factor 3; Green medium medium: Factor 4; Gray dash dot: Factor 5. In both cases, to facilitate the visual comparison, TRA spectrum has been multiply by a factor.

**Table A1.** Correlation coefficients between the first loading for PCT determination, obtained from the selected individual PLS models, and the spectra of the API and a tablet.

|                                            | <b>PCT-1<sup>st</sup> loading</b> |
|--------------------------------------------|-----------------------------------|
| <b>FOSS (76% explained Y variance)</b>     | 0.69                              |
| <b>MicroNIR (95% explained Y variance)</b> | 0.68                              |
